# Supplementary material for: Syntheses of multi-resonance frameworks towards narrowband organic light-emitting diodes
Source: Royal Society of Chemistry journal article supplement (doi:10.1039/d4cc05040a), 2024-01-01
Supplement: d4cc05040a1.pdf [file d4cc05040a1.pdf]

## Supporting Information

### **Syntheses of multi-resonance frameworks towards narrowband organic light-emitting diodes**

Tong-Yuan Zhang,<sup>a</sup> Xiao-Chun Fan,<sup>\*a</sup> Kai Wang<sup>\*a,b</sup> and Xiao-Hong Zhang<sup>\*a,c</sup>

**Table S1.** Conditions used to synthesise the compounds shown in Fig. 1

| Compound           | Condition                                                   | Solvent                 | Yield | Ref |
|--------------------|-------------------------------------------------------------|-------------------------|-------|-----|
| DOBNA              | t-BuLi, BBr <sub>3</sub> , NEtPr <sub>2</sub>               | <sup>t</sup> Bu-benzene | 62%   | 1   |
| DABNA-1            | t-BuLi, BBr <sub>3</sub> , NEtPr <sub>2</sub>               | <sup>t</sup> Bu-benzene | 31%   | 2   |
| DABNA-2            | t-BuLi, BBr <sub>3</sub> , NEtPr <sub>2</sub>               | <sup>t</sup> Bu-benzene | 32%   | 2   |
| DtBuCzB            | n-BuLi, BBr <sub>3</sub> , NEtPr <sub>2</sub>               | <sup>t</sup> Bu-benzene | 26%   | 3   |
| ADBNA-Me-Mes       | n-BuLi, BBr <sub>3</sub> , NEtPr <sub>2</sub> ,<br>Mes-MgBr | <sup>t</sup> Bu-benzene | 29%   | 4   |
| ADBNA-Me-Tip       | n-BuLi, BBr <sub>3</sub> , NEtPr <sub>2</sub> ,<br>Tip-MgBr | <sup>t</sup> Bu-benzene | 15%   | 4   |
| BBCz-DB            | n-BuLi, BBr <sub>3</sub> , NEtPr <sub>2</sub>               | <sup>t</sup> Bu-benzene | 36%   | 5   |
| BBCz-R/DBN-ICZ     | n-BuLi, BBr <sub>3</sub> , NEtPr <sub>2</sub>               | <sup>t</sup> Bu-benzene | 5%    | 5,6 |
| BBCz-Y- II/DBN-ICz | n-BuLi, BBr <sub>3</sub> , NEtPr <sub>2</sub>               | <sup>t</sup> Bu-benzene | 7%    | 5,6 |
| IDID 2BN           | n-BuLi, BBr <sub>3</sub> , NEtPr <sub>2</sub>               | <sup>t</sup> Bu-benzene | 39%   | 7   |
| DBTN-2             | t-BuLi, BBr <sub>3</sub> , NEtPr <sub>2</sub>               | <sup>t</sup> Bu-benzene | 5%    | 8   |
| 2Br                | n-BuLi, BBr <sub>3</sub> , NEtPr <sub>2</sub>               | <sup>t</sup> Bu-benzene | 38%   | 9   |
| 2TBr               | n-BuLi, BBr <sub>3</sub> , NEtPr <sub>2</sub>               | <sup>t</sup> Bu-benzene | 40%   | 9   |
| m-DBCz             | n-BuLi, BBr <sub>3</sub> , NEtPr <sub>2</sub>               | <sup>t</sup> Bu-benzene | 13%   | 10  |
| TMInBN             | n-BuLi, BBr <sub>3</sub> , NEtPr <sub>2</sub>               | <sup>t</sup> Bu-benzene | 9%    | 11  |

**Table S2.** Conditions used to synthesise the compounds shown in Fig. 2

| Compound      | Condition        | Solvent                | Yield | Ref |
|---------------|------------------|------------------------|-------|-----|
| B2            | BI <sub>3</sub>  | O-DCB                  | 76%   | 12  |
| B3            | BI <sub>3</sub>  | 1,2,4-Trichlorobenzene | 45%   | 12  |
| v-DABNA       | BBr <sub>3</sub> | O-DCB                  | 36%   | 13  |
| V-DANBA-Mes   | BBr <sub>3</sub> | O-DCB                  | 44%   | 14  |
| Δ-DABNA-TB    | BBr <sub>3</sub> | O-DCB                  | 15%   | 15  |
| v-DABNA-O2-TB | BBr <sub>3</sub> | O-DCB                  | 37%   | 15  |
| CzB2-M/TB     | BBr <sub>3</sub> | MCB                    | 72%   | 16  |
| CzDABNA-M/TB  | BBr <sub>3</sub> | Tol                    | 63%   | 16  |
| CzB4          | BI <sub>3</sub>  | O-DCB                  | 76%   | 17  |
| CzB6          | BI <sub>3</sub>  | O-DCB                  | 69%   | 17  |
| CzB8          | BI <sub>3</sub>  | O-DCB                  | 75%   | 17  |
| ω-DABNA       | BBr <sub>3</sub> | O-DCB                  | 23%   | 18  |
| B4N6          | BBr <sub>3</sub> | 1,2,4-Trichlorobenzene | 71%   | 19  |
| m[B-N]N1      | BBr <sub>3</sub> | MCB                    | 91%   | 20  |
| m[B-N]N2      | BBr <sub>3</sub> | MCB                    | 92%   | 20  |

**Table S3.** Conditions used to synthesise the compounds shown in Fig. 3

| Compound    | Condition A                             | Solvent | Yield | Ref |
|-------------|-----------------------------------------|---------|-------|-----|
| QAO/QAD     | (COCl) <sub>2</sub> , FeCl <sub>3</sub> | DCM     | 39%   | 21  |
|             | SOCl <sub>2</sub> , AlCl <sub>3</sub>   | DCM     | 60%   | 22  |
| QA-2        | (COCl) <sub>2</sub> , AlCl <sub>3</sub> | DCM     | 13%   | 23  |
| Hel-DiDiKTa | SOCl <sub>2</sub> , AlCl <sub>3</sub>   | DCM     | 60%   | 24  |
| DOBDiKTa    | SOCl <sub>2</sub> , SnCl <sub>2</sub>   | DCM     | 51%   | 25  |

**Table S4.** Conditions used to synthesise the compounds shown in Fig. 4

| Compound | Condition           | Solvent                      | Yield | Ref |
|----------|---------------------|------------------------------|-------|-----|
| SFQ      | DDQ                 | Dioxane                      | 46%   | 26  |
| SOQ      | DDQ                 | Dioxane                      | 41%   | 26  |
| SSQ      | DDQ                 | Dioxane                      | 47%   | 26  |
| SSeQ     | DDQ                 | Dioxane                      | 50%   | 26  |
| SS-DAO   | DDQ                 | DCM/H <sub>2</sub> O/Dioxane | 63%   | 27  |
| TCZBAO   | DDQ                 | DCM/H <sub>2</sub> O/Dioxane | 57%   | 28  |
| h-BNCO-1 | DDQ, O <sub>2</sub> | DMSO                         | 5%    | 29  |

**Table S5.** Conditions used to synthesise the compounds shown in Fig. 5

| Compound | Condition                     | Solvent                | Yield | Ref |
|----------|-------------------------------|------------------------|-------|-----|
| QP3O     | H <sub>2</sub> O <sub>2</sub> | HOAc                   | 91%   | 30  |
| PTZBN3   | H <sub>2</sub> O <sub>2</sub> | HOAc                   | 11%   | 31  |
| tP       | H <sub>2</sub> O <sub>2</sub> | HOAc/CHCl <sub>3</sub> | 80%   | 32  |
| tPD      | H <sub>2</sub> O <sub>2</sub> | HOAc/CHCl <sub>3</sub> | 82%   | 32  |

**Table S6.** Conditions used to synthesise the compounds shown in Fig. 6

| Compound | Condition                  | Solvent           | Yield | Ref |
|----------|----------------------------|-------------------|-------|-----|
| tBCzP2PO | n-BuLi, PhPCl <sub>2</sub> | Et <sub>2</sub> O | 60%   | 33  |

## References

1. H. Hirai, K. Nakajima, S. Nakatsuka, K. Shiren, J. Ni, S. Nomura, T. Ikuta and T. Hatakeyama, *Angew. Chem., Int. Ed. Engl.*, 2015, **54**, 13581-13585.
2. T. Hatakeyama, K. Shiren, K. Nakajima, S. Nomura, S. Nakatsuka, K. Kinoshita, J. Ni, Y. Ono and T. Ikuta, *Adv. Mater.*, 2016, **28**, 2777-2781.
3. Y. Xu, Z. Cheng, Z. Li, B. Liang, J. Wang, J. Wei, Z. Zhang and Y. Wang, *Adv. Opt. Mater.*, 2020, **8**, e1902142.
4. S. Oda, B. Kawakami, R. Kawasumi, R. Okita and T. Hatakeyama, *Org. Lett.*, 2019, **21**, 9311-9314.

5. M. Yang, I. S. Park and T. Yasuda, *J. Am. Chem. Soc.*, 2020, **142**, 19468-19472.
6. Y. Zhang, J. Wei, L. Wang, T. Huang, G. Meng, X. Wang, X. Zeng, M. Du, T. Fan, C. Yin, D. Zhang and L. Duan, *Adv. Mater.*, 2023, **35**, e2209396.
7. T. Fan, S. Zhu, X. Cao, X. Liang, M. Du, Y. Zhang, R. Liu, D. Zhang and L. Duan, *Angew. Chem., Int. Ed. Engl.*, 2023, **62**, e202313254.
8. X.-C. Fan, K. Wang, Y.-Z. Shi, Y.-C. Cheng, Y.-T. Lee, J. Yu, X.-K. Chen, C. Adachi and X.-H. Zhang, *Nat. Photonics.*, 2023, **17**, 280-285.
9. Y. Zhang, D. Zhang, T. Huang, A. J. Gillett, Y. Liu, D. Hu, L. Cui, Z. Bin, G. Li, J. Wei and L. Duan, *Angew. Chem., Int. Ed. Engl.*, 2021, **60**, 20498-20503.
10. X. Cai, Y. Pu, C. Li, Z. Wang and Y. Wang, *Angew. Chem., Int. Ed. Engl.*, 2023, **62**, e202304104.
11. C.-Z. Du, Y. Lv, H. Dai, X. Hong, J. Zhou, J.-K. Li, R.-R. Gao, D. Zhang, L. Duan and X.-Y. Wang, *J. Mater. C.C.*, 2023, **11**, 2469-2474.
12. K. Matsui, S. Oda, K. Yoshiura, K. Nakajima, N. Yasuda and T. Hatakeyama, *J. Am. Chem. Soc.*, 2018, **140**, 1195-1198.
13. Y. Kondo, K. Yoshiura, S. Kitera, H. Nishi, S. Oda, H. Gotoh, Y. Sasada, M. Yanai and T. Hatakeyama, *Nat. Photonics.*, 2019, **13**, 678-682.
14. S. Oda, B. Kawakami, Y. Yamasaki, R. Matsumoto, M. Yoshioka, D. Fukushima, S. Nakatsuka and T. Hatakeyama, *J. Am. Chem. Soc.*, 2022, **144**, 106-112.
15. M. Hayakawa, X. Tang, Y. Ueda, H. Eguchi, M. Kondo, S. Oda, X. C. Fan, G. N. Iswara Lestanto, C. Adachi and T. Hatakeyama, *J. Am. Chem. Soc.*, 2024, **146**, 18331-18340.
16. S. Oda, W. Kumano, T. Hama, R. Kawasumi, K. Yoshiura and T. Hatakeyama, *Angew. Chem., Int. Ed. Engl.*, 2021, **60**, 2882-2886.
17. Y. Sano, T. Shintani, M. Hayakawa, S. Oda, M. Kondo, T. Matsushita and T. Hatakeyama, *J. Am. Chem. Soc.*, 2023, **145**, 11504-11511.
18. S. Uemura, S. Oda, M. Hayakawa, R. Kawasumi, N. Ikeda, Y. T. Lee, C. Y. Chan, Y. Tsuchiya, C. Adachi and T. Hatakeyama, *J. Am. Chem. Soc.*, 2023, **145**, 1505-1511.
19. X. C. Fan, F. Huang, H. Wu, H. Wang, Y. C. Cheng, J. Yu, K. Wang and X. H. Zhang, *Angew. Chem., Int. Ed. Engl.*, 2023, **62**, e202305580.
20. G. Meng, H. Dai, T. Huang, J. Wei, J. Zhou, X. Li, X. Wang, X. Hong, C. Yin, X. Zeng, Y. Zhang, D. Yang, D. Ma, G. Li, D. Zhang and L. Duan, *Angew. Chem., Int. Ed. Engl.*, 2022, **61**, e202207293.
21. Y. Yuan, X. Tang, X. Y. Du, Y. Hu, Y. J. Yu, Z. Q. Jiang, L. S. Liao and S. T. Lee, *Adv. Opt. Mater.*, 2019, **7**, e1801536.
22. X. Li, Y. Z. Shi, K. Wang, M. Zhang, C. J. Zheng, D. M. Sun, G. L. Dai, X. C. Fan, D. Q. Wang, W. Liu, Y. Q. Li, J. Yu, X. M. Ou, C. Adachi and X. H. Zhang, *ACS Appl. Mater. Interfaces*, 2019, **11**, 13472-13480.
23. H. Min, I. S. Park and T. Yasuda, *Angew. Chem., Int. Ed. Engl.*, 2021, **60**, 7643-7648.
24. J. M. dos Santos, D. Sun, J. M. Moreno-Naranjo, D. Hall, F. Zinna, S. T. J. Ryan, W. Shi, T. Matulaitis, D. B. Cordes, A. M. Z. Slawin, D. Beljonne, S. L. Warriner, Y. Olivier, M. J. Fuchter and E. Zysman-Colman, *J. Mater. C.C.*, 2022, **10**, 4861-4870.
25. S. Wu, L. Zhang, J. Wang, A. Kumar Gupta, I. D. W. Samuel and E. Zysman-Colman, *Angew. Chem., Int. Ed. Engl.*, 2023, **62**, e202305182.
26. Y. J. Yu, Z. Q. Feng, X. Y. Meng, L. Chen, F. M. Liu, S. Y. Yang, D. Y. Zhou, L. S. Liao and Z. Q. Jiang, *Angew. Chem., Int. Ed. Engl.*, 2023, **62**, e202310047.
27. L. Liang, C. Qu, X. Fan, K. Ye, Y. Zhang, Z. Zhang, L. Duan and Y. Wang, *Angew. Chem., Int. Ed. Engl.*, 2024, **63**, e202316710.

28. Z. Yang, G. X. Yang, S. Jiang, M. Li, W. Qiu, X. Peng, C. Shen, Y. Gan, K. Liu, D. Li and S. J. Su, *Adv. Opt. Mater.*, 2023, **12**, 2301711.
29. Y. C. Cheng, X. Tang, K. Wang, X. Xiong, X. C. Fan, S. Luo, R. Walia, Y. Xie, T. Zhang, D. Zhang, J. Yu, X. K. Chen, C. Adachi and X. H. Zhang, *Nat. Commun.*, 2024, **15**, 731.
30. X. Wu, B.-K. Su, D.-G. Chen, D. Liu, C.-C. Wu, Z.-X. Huang, T.-C. Lin, C.-H. Wu, M. Zhu, E. Y. Li, W.-Y. Hung, W. Zhu and P.-T. Chou, *Nat. Photonics.*, 2021, **15**, 780-786.
31. T. Hua, J. Miao, H. Xia, Z. Huang, X. Cao, N. Li and C. Yang, *Adv. Funct. Mater.*, 2022, **32**, e2201032.
32. Jiang, Y. Yu, D. Li, Z. Chen, Y. He, M. Li, G. X. Yang, W. Qiu, Z. Yang, Y. Gan, J. Lin, Y. Ma and S. J. Su, *Angew. Chem., Int. Ed. Engl.*, 2023, **62**, e202218892.
33. P. Ma, Y. Chen, Y. Man, Q. Qi, Y. Guo, H. Wang, Z. Li, P. Chang, C. Qu, C. Han and H. Xu, *Angew. Chem., Int. Ed. Engl.*, 2024, **63**, e202316479.
